# Supplementary material for: Comprehensive Characterization of Blue Wire NiTi File Failure: A Comparative Analysis of Cyclic Fatigue and Torsional Resistance Properties
Source: MDPI journal article supplement (doi:10.3390/coatings14030361), 2024-03-19
Supplement: s1 [file s1]

## Article

# Supplementary Materials: Comprehensive Characterization of Blue Wire NiTi File Failure: A Comparative Analysis of Cyclic Fatigue and Torsional Resistance Properties

Reem M. Barakat <sup>1</sup>, Rahaf A. Almohareb <sup>2,\*</sup>, Fahda N. Algahtani <sup>2</sup>, Amal A. Altamimi <sup>2</sup>, Jenan I. Alfuraih <sup>2</sup>, Lena S. Bahlol <sup>2</sup> and Ahmed Jamleh <sup>3</sup>

<sup>1</sup> Dental Clinics Department, King Abdullah bin Abdulaziz University Hospital, Princess Nourah Bint Abdulrahman University, Box 84428, Riyadh 11671, Saudi Arabia

<sup>2</sup> Department of Clinical Dental Sciences, College of Dentistry, Princess Nourah bint Abdulrahman University P.O. Box 84428, Riyadh 1167, Saudi Arabia

<sup>3</sup> Department of Restorative Dentistry, College of Dental Medicine, University of Sharjah, Sharjah 27272, United Arab Emirates

\* Correspondence: raalmohareb@pnu.edu.sa

**Citation:** Barakat, R.M.; Almohareb, R.A.; Algahtani, F.N.; Altamimi, A.A.; Alfuraih, J.I.; Bahlol, L.S.; Jamleh, A. Comprehensive Characterization of Blue Wire NiTi File Failure: A Comparative Analysis of Cyclic Fatigue and Torsional Resistance Properties. *Coatings* **2024**, *14*, 361. <https://doi.org/10.3390/coatings14030361>

Received: 26 February 2024

Revised: 12 March 2024

Accepted: 16 March 2024

Published: 19 March 2024

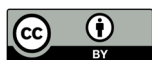

**Copyright:** © 2024 by the authors.

Licensee MDPI, Basel, Switzerland.

This article is an open access article distributed under the terms and conditions of the Creative Commons Attribution (CC BY) license

(<https://creativecommons.org/licenses/by/4.0/>).

**Table S1.** Data set for cyclic fatigue testing

| SERIAL | FILE 0=tia<br>1= Race | MEDIUM<br>0=saline<br>1=NaOCL | time in<br>seconds | cycles to<br>failure | length of<br>fragment | NCF      | GRP |
|--------|-----------------------|-------------------------------|--------------------|----------------------|-----------------------|----------|-----|
| 1      | 0                     | 0                             | 295                | 1721                 | 3.49                  | 1720.833 | 1   |
| 2      | 0                     | 0                             | 788                | 4597                 | 3.92                  | 4596.667 | 1   |
| 3      | 0                     | 0                             | 721                | 4206                 | 3.51                  | 4205.833 | 1   |
| 4      | 0                     | 0                             | 612                | 3570                 | 3.62                  | 3570     | 1   |
| 5      | 0                     | 0                             | 710                | 4142                 | 5.99                  | 4141.667 | 1   |
| 6      | 0                     | 0                             | 502                | 2928                 | 4.33                  | 2928.333 | 1   |
| 7      | 0                     | 0                             | 693                | 4043                 | 3.89                  | 4042.5   | 1   |
| 8      | 0                     | 0                             | 624                | 3640                 | 4.13                  | 3640     | 1   |
| 9      | 0                     | 0                             | 517                | 3016                 | 4.37                  | 3015.833 | 1   |
| 10     | 0                     | 0                             | 474                | 2765                 | 5.08                  | 2765     | 1   |
| 11     | 0                     | 0                             | 645                | 3763                 | 4.26                  | 3762.5   | 1   |
| 12     | 0                     | 0                             | 547                | 3191                 | 3.73                  | 3190.833 | 1   |
| 13     | 0                     | 0                             | 750                | 4375                 | 4.64                  | 4375     | 1   |
| 14     | 0                     | 0                             | 563                | 3284                 | 5.17                  | 3284.167 | 1   |
| 15     | 0                     | 0                             | 595                | 3471                 | 4.24                  | 3470.833 | 1   |
| 16     | 0                     | 1                             | 396                | 2310                 | 4.54                  | 2310     | 2   |
| 17     | 0                     | 1                             | 449                | 2619                 | 4.15                  | 2619.167 | 2   |
| 18     | 0                     | 1                             | 430                | 2508                 | 4.75                  | 2508.333 | 2   |
| 19     | 0                     | 1                             | 360                | 2100                 | 5.02                  | 2100     | 2   |
| 20     | 0                     | 1                             | 348                | 2030                 | 4.05                  | 2030     | 2   |
| 21     | 0                     | 1                             | 355                | 2071                 | 5.22                  | 2070.833 | 2   |
| 22     | 0                     | 1                             | 295                | 1721                 | 3.84                  | 1720.833 | 2   |
| 23     | 0                     | 1                             | 510                | 2975                 | 3.72                  | 2975     | 2   |
| 24     | 0                     | 1                             | 529                | 3086                 | 4.82                  | 3085.833 | 2   |
| 25     | 0                     | 1                             | 489                | 2853                 | 4.13                  | 2852.5   | 2   |
| 26     | 0                     | 1                             | 503                | 2934                 | 5.11                  | 2934.167 | 2   |
| 27     | 0                     | 1                             | 512                | 2987                 | 4.65                  | 2986.667 | 2   |
| 28     | 0                     | 1                             | 481                | 2806                 | 3.98                  | 2805.833 | 2   |
| 29     | 0                     | 1                             | 471                | 2748                 | 5.21                  | 2747.5   | 2   |
| 30     | 0                     | 1                             | 467                | 2724                 | 4.93                  | 2724.167 | 2   |
| 31     | 1                     | 0                             | 371                | 4947                 | 4.26                  | 4946.667 | 3   |
| 32     | 1                     | 0                             | 641                | 8547                 | 4.34                  | 8546.667 | 3   |
| 33     | 1                     | 0                             | 415                | 5533                 | 5.03                  | 5533.333 | 3   |
| 34     | 1                     | 0                             | 591                | 7880                 | 4.22                  | 7880     | 3   |
| 35     | 1                     | 0                             | 369                | 4920                 | 4.79                  | 4920     | 3   |
| 36     | 1                     | 0                             | 420                | 5600                 | 4.34                  | 5600     | 3   |
| 37     | 1                     | 0                             | 445                | 5933                 | 4.41                  | 5933.333 | 3   |
| 38     | 1                     | 0                             | 541                | 7213                 | 5.21                  | 7213.333 | 3   |
| 29     | 1                     | 0                             | 389                | 5187                 | 4.67                  | 5186.667 | 3   |
| 40     | 1                     | 0                             | 363                | 4840                 | 4.17                  | 4840     | 3   |
| 41     | 1                     | 0                             | 557                | 7427                 | 4.29                  | 7426.667 | 3   |
| 42     | 1                     | 0                             | 603                | 8040                 | 5.12                  | 8040     | 3   |
| 43     | 1                     | 0                             | 639                | 8520                 | 4.52                  | 8520     | 3   |
| 44     | 1                     | 0                             | 588                | 7840                 | 4.36                  | 7840     | 3   |

|    |   |   |     |      |      |          |   |
|----|---|---|-----|------|------|----------|---|
| 45 | 1 | 0 | 551 | 7347 | 4.63 | 7346.667 | 3 |
| 46 | 1 | 1 | 330 | 4400 | 4.25 | 4400     | 4 |
| 47 | 1 | 1 | 586 | 7813 | 4.49 | 7813.333 | 4 |
| 48 | 1 | 1 | 506 | 6747 | 4.02 | 6746.667 | 4 |
| 49 | 1 | 1 | 601 | 8013 | 4.33 | 8013.333 | 4 |
| 50 | 1 | 1 | 616 | 8213 | 4.73 | 8213.333 | 4 |
| 51 | 1 | 1 | 633 | 8440 | 5.03 | 8440     | 4 |
| 52 | 1 | 1 | 578 | 7707 | 4.03 | 7706.667 | 4 |
| 53 | 1 | 1 | 531 | 7080 | 4.83 | 7080     | 4 |
| 54 | 1 | 1 | 636 | 8480 | 4.35 | 8480     | 4 |
| 55 | 1 | 1 | 474 | 6320 | 4.68 | 6320     | 4 |
| 56 | 1 | 1 | 641 | 8547 | 5.27 | 8546.667 | 4 |
| 57 | 1 | 1 | 607 | 8093 | 5.12 | 8093.333 | 4 |
| 58 | 1 | 1 | 552 | 7360 | 4.59 | 7360     | 4 |
| 59 | 1 | 1 | 658 | 8773 | 4.92 | 8773.333 | 4 |
| 60 | 1 | 1 | 583 | 7773 | 4.71 | 7773.333 | 4 |

Table S2. Data set for torsional fatigue testing.

|      | TiaDent           |         |                  |        | Race Evo          |         |                  |        |
|------|-------------------|---------|------------------|--------|-------------------|---------|------------------|--------|
|      | Torque at failure | seconds | Angular rotation | length | Torque at failure | seconds | Angular rotation | length |
| 1    | 1.5               | 4.4     | 1056             | 5.17   | 1.2               | 3.6     | 864              | 5.37   |
| 2    | 1.2               | 2.6     | 624              | 5.1    | 1.1               | 3.8     | 912              | 4.91   |
| 3    | 1.4               | 3.5     | 840              | 4.98   | 1.1               | 2.8     | 672              | 5.33   |
| 4    | 1                 | 2.8     | 672              | 5.24   | 1.1               | 3.1     | 744              | 5.17   |
| 5    | 1.3               | 3.2     | 768              | 5.42   | 1                 | 3.3     | 792              | 4.98   |
| 6    | 1.2               | 3.3     | 792              | 5.09   | 1                 | 4       | 960              | 5      |
| 7    | 1.2               | 3.2     | 768              | 5.38   | 1.1               | 3.3     | 792              | 4.85   |
| 8    | 1.2               | 3.7     | 888              | 5.29   | 1.1               | 3.7     | 888              | 4.92   |
| 9    | 1.1               | 3.1     | 744              | 5.1    | 0.9               | 3.7     | 888              | 5      |
| 10   | 1.2               | 3.4     | 816              | 5.26   | 0.8               | 2.9     | 696              | 4.98   |
| 11   | 1                 | 2.9     | 696              | 5.25   | 0.9               | 3.5     | 840              | 4.99   |
| 12   | 1.1               | 3.5     | 840              | 4.47   | 1                 | 2.7     | 648              | 5.02   |
| 13   | 1.2               | 3.4     | 816              | 5.38   | 1                 | 3.6     | 864              | 4.88   |
| 14   | 1.3               | 4.1     | 984              | 4.72   | 1.1               | 3.7     | 888              | 5.06   |
| 15   | 1.3               | 4       | 960              | 5.34   | 1                 | 3.4     | 816              | 5.24   |
| AV G | 1.21              | 3.41    | 817.60           | 5.15   | 1.03              | 3.41    | 817.60           | 5.05   |
| SD   | 0.14              | 0.49    | 118.09           | 0.26   | 0.10              | 0.39    | 92.72            | 0.16   |
| Min  | 1.00              | 2.60    | 624.00           | 4.47   | 0.80              | 2.70    | 648.00           | 4.85   |
| Max  | 1.50              | 4.40    | 1056.00          | 5.42   | 1.20              | 4.00    | 960.00           | 5.37   |

**Disclaimer/Publisher's Note:** The statements, opinions and data contained in all publications are solely those of the individual author(s) and contributor(s) and not of MDPI and/or the editor(s). MDPI and/or the editor(s) disclaim responsibility for any injury to people or property resulting from any ideas, methods, instructions or products referred to in the content.
